# Supplementary material
Source: publisher figshare collection journal article supplement (https://gsajournals.figshare.com/ndownloader/files/26619611)
Supplement: Supplementary file 1 [file 26619611]

**Supplementary Figure 1**

atg gac gac aca gag ggt aac tcc tcg atg gat tcc att cga aat ggt caa tca agt cca ctt cca cag gtc act

 M   D    D    T    E    G    N    S    S   M   D    S    I    R    N    G    Q   S    S    P   L    P    Q    V    T

cca cgc tta cca caa atc ccg atg atg atg cgt gag aca cca ctt tcc aca aaa cgt gag cgc caa gca att act

 P    R    L    P    Q    I    P    M   M   M   R    E    T    P    L   S    T    K    R    E    R    Q    A    I    T

cca cgt ttc cgt cgt cca gct ccg aaa atg ata aaa act atg cca cca aca aga agc att tgg tct gtt cgg aag

 P    R   F    R    R    P    A    P    K    M   I     K    T    M    P    P    T    R    S    I    W   S   V    R    K

gag tcg gtc cca ctt ttg gtc act ccg cag gga cca aaa cca ctg gaa tcg cca aag tac gat cat aca aat gct

 E    S    V    P    L   L   V    T    P    Q    G    P    K    P    L    E    S    P    K    Y    D    H    T    N    A

caa tca ttc ttt gaa caa gta ttt caa atc gat gaa atc att gga aga ggc tcg ttc gga gaa gta ttc gca gcc

 Q    S   F    F    E    Q    V    F   Q    I    D    E    I    I    G    R    G    S    F    G   E    V    F    A    A

aga tgc cgt gag gat tcc caa ttg tat gct gtc aaa gta tcg tta gct ccg atc cgg caa cat tca att tcc aag

 R    C    R    E    D    S    Q    L    Y    A    V    K    V    S    L   A    P    I    R    Q    H    S    I    S    K

tac cga gaa gct gag agc cat atg atc att cca ccg cat aag aat ctt gtc aag ttc tac aga gcc tgg gag gaa

 Y    R    E    A    E    S    H   M    I    I   P    P    H    K    N    L    V    K    F    Y    R    A    W   E    E

act ggt cga ttg tat att caa aca gaa ctt tgc gat caa agt ctt ttg aaa tat tgt aca gag aaa cat gca cta

T   G    R    L    Y    I    Q    T    E    L    C    D    Q    S    L    L    K    Y   C    T    E    K    H    A    L

ccg gag gac gaa att tgg aat att ttc gta gat ttg ctc caa gct gtt cat cat ttg cac tcg aac gac atg att

  P    E    D    E    I    W   N    I    F    V    D    L    L    Q    A    V   H    H    L    H   S    N    D    M    I

cat gat gat att aaa ccg gaa aac att ttt ctt aca aag gac atg ata tgc aaa ctc gga gat ttt ggt ttg gtt

 H    D    D    I    K    P    E    N    I    F    L    T    K    D    M   I    C    K    L    G    D    F   G    L    V

att aac ctt aaa aat cca aat gat gtg aaa tca gcg gaa gaa ggt gac tcg aaa tat ctt gct cca gaa gtt ttg

  I    N    L    K    N    P   N    D    V    K   S    A    E    E    G    D    S    K    Y    L    A    P    E    V    L

aac ggc cgt ccc acg aaa tca tca gac att ttc agt cta gga atg aca att ctt gag gct act act gat ctt gac

 N   G    R    P    T     K    S    S    D    I    F    S    L    G    M    T    I    L    E    A    T    T    D    L    D

gtt cca tca aat gga gat tcg tgg cat caa atc aga aat gga cag att cct gat aga ttc ttc gct gga att tct

  V    P    S    N    G    D    S    W   H    Q    I    R    N    G    Q    I    P    D    R    F   F    A    G    I    S

aca gat ctt cgc agt tta att gcc ttg atg ctt gac tct gat ccg agg att cgt cca aca agt cga gat ttg ctt

  T    D    L    R    S    L    I    A    L    M   L    D    S    D    P   R    I    R    P    T    S    R    D    L    L

gat cat ccg gta atc aag aag aag ctc atg aag cgt gga acc tat gta aaa tgc att tca att ctt aac ggc ttt

 D    H    P    V    I    K    K    K    L    M   K    R    G    T    Y    V    K    C    I    S    I    L    N    G    F

ttc tac gcc ttc agt gct gtt ctt gtc tgg gta atg gct ttc ttc tcg gtg ctc ttt cat cct att gtt cgc ttc

 F   Y    A    F    S     A    V    L    V    W   V   M   A    F    F    S    V    L   F    H    P    I    V   R    F

cat gct gca att aaa gac cgg caa tcg gaa att tgt gcg caa ttt gtc aat aat cag cag cac act ccc atc caa

  H   A    A    I    K    D    R    Q    S    E    I    C    A    Q    F   V    N   N    Q   Q   H    T    P    I    Q

act cca gag act tct aaa gtt tat ttg gaa tct ctt act gga gtg gct gtt cgc caa gca tct caa att gtg tct

 T    P    E    T    S    K    V   Y    L    E    S    L   T     G    V   A    V   R    Q    A    S   Q    I    V    S

cct ttc gat ttt tcc gat gat gag aat cca cca aac gcg caa cgc cgt ttg ttc act ggt gca gtg ccg tgt cgc

 P   F    D    F   S    D   D    E    N    P    P    N    A    Q    R    R    L    F    T    G    A    V    P    C    R

ttg aac ttt gat aac gat caa gat gac gat gag gaa cag gcg act tgc tca tca tca aac tct tca gct att gag

L    N    F   D    N    D    Q    D    D    D    E    E    Q    A    T   C    S    S    S    N    S   S    A    I    E

ccc caa ttg gat gaa ccg gag agt ccg ccg aga atg aac gat gtt att gat aaa ctt gga aaa cga gga act cca

  P    Q    L    D    E    P    E    S    P    P    R    M   N   D    V    I    D    K    L    G   K    R    G    T    P

aga tca gct cgt cgt aat ctc act ttc aac cgt cat cgt caa gta gcc gcg tca gtt gca ccg aaa tcg tcg cta

  R    S    A    R    R    N    L    T    F    N    R    H    R    Q    V   A    A    S    V    A    P    K    S    S    L

aat cat tat aat cat cac act gga tct gga gat gga ttt agt aat aac tct cta att cca att agt gat caa gaa

  N    H   Y    N    H    H    T    G    S   G   D    G    F    S    N    N    S    L    I    P    I    S    D    Q    E

cga acg gaa aaa tat ctc cga atg cga ctc acc gag caa cag tta gat tgg gca gat cag aat aat gtg atc gac

  R    T    E    K    Y    L    R    M    R    L    T    E    Q    Q    L    D    W   A    D    Q    N    N    V    I    D

gag gct cca cca cca atg tct tgt ccg cca aga atc cga aga agc att cgt gat cta ccg aga atg cct gtt ctc

  E    A    P    P    P    M   S    C    P    P    R    I    R    R    S    I    R   D    L    P   R    M    P    V    L

aac ttt aac gtt ctc gac gag cca tcg aat aaa ccg act gtt gat cat cat acg att ttg gag caa tcg gaa tcg

  N    F   N    V    L    D    E    P    S    N    K    P    T    V   D   H    H    T    I    L    E    Q    S    E    S

cca cgt aga aga tta aat aga ggg gct aag cct gtg cct cgt aat aga atg atg tca ttt gga tca tca ggc gac

  P    R    R    R    L    N    R    G    A    K   P   V    P    R    N    R    M    M   S    F    G    S    S    G    D

gag gtt taa

 E    V    -

**Figure S1: *wee-1.3* sequence and mutations**

The coding and amino acid sequence of *wee-1.3.* Green highlights show the position of the missense G1459A (E487K) mutation found in *wee-1.3(lz5)* and engineered in *wee-1.3(syb1738).* Yellow highlights show the positions of silent mutations (A1392G, A1461G, G1247C, and G1521A) in *wee-1.3(syb1738)* introduced to prevent recutting by Cas9.
